# Supplementary material for: Multi-Omic Analyses Provide Links between Low-Dose Antibiotic Treatment and Induction of Secondary Metabolism in Burkholderia thailandensis
Source: PubMed Central journal article supplement (PMC7042699; doi:10.1128/mbio.03210-19), 2020-02-25

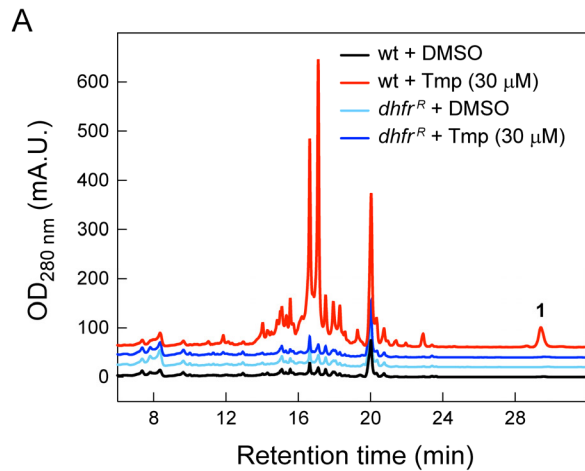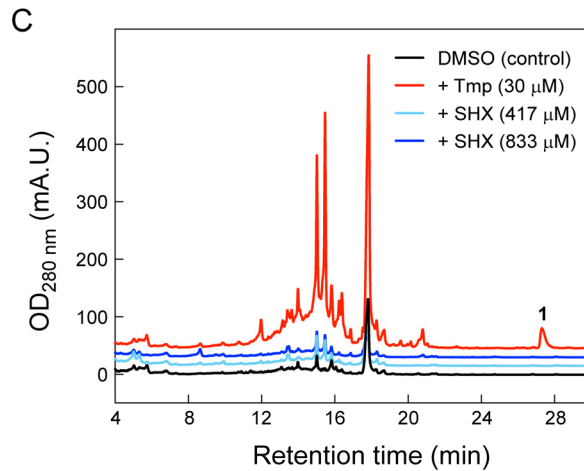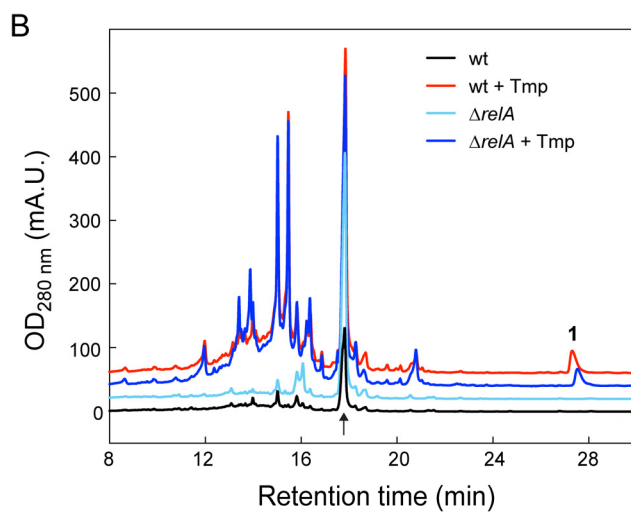

Supplement: mBio.03210-19-sf003.pdf [file mBio.03210-19-sf003.pdf]
